# Supplementary material for: Electromyographic analysis of the serratus anterior and upper trapezius in closed kinetic chain exercises performed on different unstable support surfaces: a systematic review and meta-analysis
Source: PeerJ. 2022 Jun 30;10:e13589. doi: 10.7717/peerj.13589 (PMC9250763; doi:10.7717/peerj.13589)
Supplement: Data S1 — EMG mean ± standard deviation (SD) of scapular muscles during push-ups on different surfaces. The data were standardized using post score SD. [file peerj-10-13589-s004.xlsx]

## Sheet: UT_stable_vs_suspen
		Stable surface			Suspension surface
	Study name	Mean	SD	n	Mean	SD	n		Difference between means
	Borreani (2015a) Suspension	5.83	0.58	29	14.69	1.91	29		-8.86
	De Mey (2014) Suspension (HPU)	9.62	6.47	47	14.11	9.61	47		-4.49
	Calatayud (2014a) Suspension	5.28	0.65	29	9.4	1.35	29		-4.12
	Calatayud (2014b) Suspension	5.9	0.56	29	20.39	2.65	29		-14.49
	Horsak (2017) suspension	7.04	2.65	19	6.42	2.76	19		0.62
	Lee (2013) Suspension	15.8	10.2	10	19.5	28.6	10		-3.7

## Sheet: UT_stable_vs_wooble
		Stable surface			wooble surface
	Study name	Mean	SD	n	Mean	SD	n		Difference between means
	de Araujo (2017) wooble board	17.03	13.42	18	22.47	18.35	18		-5.44
	Gioftsos (2016) wooble board	28.6	9.2	13	30	12.2	13		-1.4
	Torres (2014) Wooble Board	36.4	22.01	30	47.9	26.57	30		-11.5
	de Farias (2020) wooble board	16.07	10.75	14	24.12	18.15	14		-8.05
	Park (2013b) wooble board	31.68	10.74	16	40.1	13.97	16		-8.42
	Park (2013a) wooble board	31.08	15.48	14	41.51	16.46	14		-10.43
	Patsleas (2021) wooble modifcado	9.4	4.2	13	10.2	5.3	13		-0.8
	Maenhout (2010) wooble	13.63	7.27	32	13.67	8	32		-0.04

## Sheet: UT_stable_vs_bossu
		Stable surface			bosu surface
	Study name	Mean	SD	n	Mean	SD	n		Difference between means
	de Araujo (2020) (bosu invertido)	51.2	43.61	23	53.55	13.28	23		-2.35
	Tucker (2010) Bossu	44.69	30.24	15	61.64	47.44	15		-16.95
	Karagianakis (2017) Bossu invertido (KPU)	12	6.32	15	16	8.12	15		-4

## Sheet: UT_stable_vs_ball
		Stable surface			ball surface
	Study name	Mean	SD	n	Mean	SD	n		Difference between means
	Lehman (2008) Ball (HPU)	5.2	6.4	10	10.5	6.9	10		-5.3
	Seo (2013) Ball (HPU)	42.84	21.35	10	73.26	16.34	10		-30.42
	Sandhu (2008) Ball (HPU)	93.77	65.3	35	167.6	81.94	35		-73.83

## Sheet: SA_stable_vs_suspen
		Stable surface			Suspension surface
	Study name	Mean	SD	n	Mean	SD	n		Difference between means
	Borreani (2015b) Suspension	29.07	3.76	30	75.48	9.42	30		-46.41
	Calatayud (2014a) Suspension	24.38	2.29	29	13.11	1.32	30		11.27
	De Mey (2014) Suspension (HPU)	43.56	25.02	47	38.69	24.94	47		4.87
	Youdas (2020) Suspension	43	26.7	32	31	20.04	32		12
	Horsak (2017) suspension	43.86	26.16	19	42.12	21.92	19		1.74
	Lee (2013) suspension	39.5	12.2	10	43.2	12.1	10		-3.7
									-3.37167

## Sheet: SA_stable_vs_wooble
		Stable surface			wooble surface
	Study name	Mean	SD	n	Mean	SD	n		Difference between means
	Borreani (2015b) Wooble Board	29.07	3.76	30	95.83	13.24	30		-66.76
	de Araujo (2017) Wooble Board	27.49	12.94	18	27.74	11.95	18		-0.25
	Gioftsos (2016) Wooble Board	60.7	17.1	13	57.8	10.3	13		2.9
	Park (2013b) Wooble Board	39.83	12.05	16	44.72	11.75	16		-4.89
	Torres (2014) Wooble Board	70.81	34.45	30	58.21	30.63	30		12.6
	Farias (2020) wooble board	61.07	24.22	14	57.19	22.86	14		3.88
	Park (2013a) Wooble Board	18.4	6.72	14	18.95	8.93	14		-0.55
	Patselas (2021)	92.6	53.5	13	97.3	67.9	13		-4.7
	Maenhout (2010)	31.65	19.11	32	25.3	15.77	32		6.35
									-5.71333

## Sheet: SA_stable_vs_bosu
		Stable surface			bosu surface
	Study name	Mean	SD	n	Mean	SD	n		Difference between means
	de Araujo (2020) (bosu invertido)	92.25	67.2	23	76.85	56.12	23		15.4
	Karagianakis (2017) Bossu invertido (KPU)	68	25.28	15	61	30.6	15		7
	Tucker (2010) Bosu invertido	56.16	24.35	15	48.26	21.69	15		7.9
	Kim(2014) (KPU)	37.79	14.41	15	76.21	41.31	15		-38.42
	Borreani (2015b) Bosu	29.07	3.76	30	95.12	11.68	30		-66.05
									-14.834

## Sheet: SA_stable_vs_ball
		Stable surface			bosu surface
	Study name	Mean	SD	n	Mean	SD	n		Difference between means
	Lehman (2008) Ball (HPU)	24.2	14.5	10	19.7	11.5	10		4.5
	Seo (2013) Ball (HPU)	29.84	10.36	10	39.37	24.92	10		-9.53
	Sandhu (2008) Ball (HPU)	48.98	24.63	30	60.34	36.81	30		-11.36
