# Supplementary material for: Electromyographic analysis of the serratus anterior and upper trapezius in closed kinetic chain exercises performed on different unstable support surfaces: a systematic review and meta-analysis
Source: PeerJ journal article supplement (doi:10.7717/peerj.13589), 2022-06-30
Supplement: PRISMA_2020_Abstract_Checklist.pdf [file PRISMA_2020_Abstract_Checklist.pdf]

## PRISMA Abstract Checklist

| Topic                          | No. | Item                                                                                                                                                                                                                                                                                                  | Reported? |
|--------------------------------|-----|-------------------------------------------------------------------------------------------------------------------------------------------------------------------------------------------------------------------------------------------------------------------------------------------------------|-----------|
| <b>TITLE</b>                   |     |                                                                                                                                                                                                                                                                                                       |           |
| <b>Title</b>                   | 1   | Identify the report as a systematic review.                                                                                                                                                                                                                                                           | Yes       |
| <b>BACKGROUND</b>              |     |                                                                                                                                                                                                                                                                                                       |           |
| <b>Objectives</b>              | 2   | Provide an explicit statement of the main objective(s) or question(s) the review addresses.                                                                                                                                                                                                           | Yes       |
| <b>METHODS</b>                 |     |                                                                                                                                                                                                                                                                                                       |           |
| <b>Eligibility criteria</b>    | 3   | Specify the inclusion and exclusion criteria for the review.                                                                                                                                                                                                                                          | Yes       |
| <b>Information sources</b>     | 4   | Specify the information sources (e.g. databases, registers) used to identify studies and the date when each was last searched.                                                                                                                                                                        | Yes       |
| <b>Risk of bias</b>            | 5   | Specify the methods used to assess risk of bias in the included studies.                                                                                                                                                                                                                              | Yes       |
| <b>Synthesis of results</b>    | 6   | Specify the methods used to present and synthesize results.                                                                                                                                                                                                                                           | Yes       |
| <b>RESULTS</b>                 |     |                                                                                                                                                                                                                                                                                                       |           |
| <b>Included studies</b>        | 7   | Give the total number of included studies and participants and summarise relevant characteristics of studies.                                                                                                                                                                                         | Yes       |
| <b>Synthesis of results</b>    | 8   | Present results for main outcomes, preferably indicating the number of included studies and participants for each. If meta-analysis was done, report the summary estimate and confidence/credible interval. If comparing groups, indicate the direction of the effect (i.e. which group is favoured). | Yes       |
| <b>DISCUSSION</b>              |     |                                                                                                                                                                                                                                                                                                       |           |
| <b>Limitations of evidence</b> | 9   | Provide a brief summary of the limitations of the evidence included in the review (e.g. study risk of bias, inconsistency and imprecision).                                                                                                                                                           | Yes       |
| <b>Interpretation</b>          | 10  | Provide a general interpretation of the results and important implications.                                                                                                                                                                                                                           | Yes       |
| <b>OTHER</b>                   |     |                                                                                                                                                                                                                                                                                                       |           |
| <b>Funding</b>                 | 11  | Specify the primary source of funding for the review.                                                                                                                                                                                                                                                 | Yes       |
| <b>Registration</b>            | 12  | Provide the register name and registration number.                                                                                                                                                                                                                                                    | Yes       |
